# Supplementary material for: Unparalleled sensitivity of photonic structures in butterfly wings
Source: Royal Society of Chemistry journal article supplement (doi:10.1039/c4ra06117a), 2014-01-01
Supplement: c4ra06117a1.pdf [file c4ra06117a1.pdf]

## Supplementary Information

### Unparalleled sensitivity of photonic structures in butterfly wings

Zhiwu Han<sup>a\*</sup>, Shichao Niu<sup>a</sup>, Meng Yang<sup>a</sup>, Zhengzhi Mu<sup>a</sup>, Bo Li<sup>a</sup>, Junqiu Zhang<sup>a</sup>,  
Junfeng Ye<sup>b</sup> and Luquan Ren<sup>a</sup>

<sup>a</sup>Key Laboratory of Bionic Engineering (Ministry of Education, China), Jilin University,  
Changchun 130022, P. R. China.

<sup>b</sup>First Hospital of Jilin University, Changchun 130022, P. R. China.

\*Corresponding author: [zwhan@jlu.edu.cn](mailto:zwhan@jlu.edu.cn)

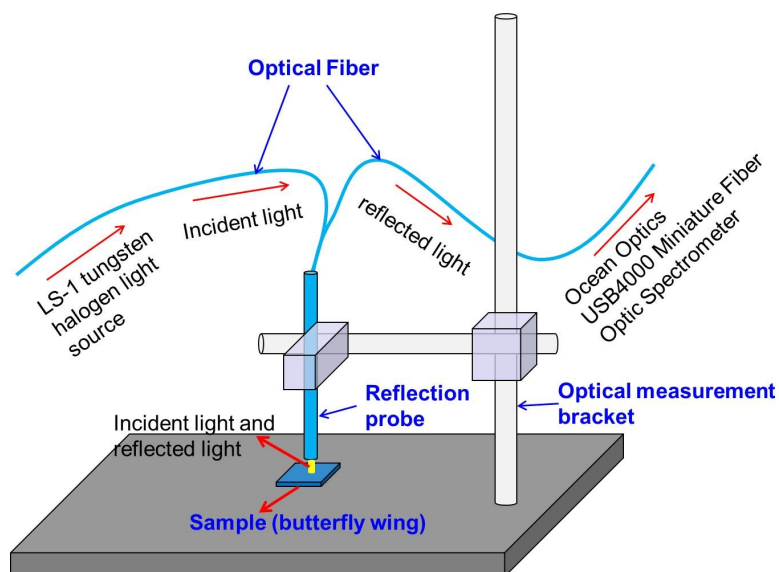

**Fig. S1** Simplified experimental device and its working principle. Incident light is emitted from LS-1 tungsten halogen light source and transported by an optical fiber. Then, the incident light was irradiated on the sample of butterfly wing scales. The reflected light was captured and inputted by the optical fiber and transported into Ocean Optics USB4000 Miniature Fiber Optical Spectrometer. All the experimental device is composed of six parts: Optical measurement bracket, LS-1 tungsten halogen light source, Optical fiber, Reflection probe, Ocean Optics USB4000 Miniature Fiber Optic Spectrometer and the samples.

**Table. S1** Concentrations of vapors of water, ether and ethanol

| Vapors  | Concentration 1 (p.p.m) | Concentration 2 (p.p.m) | Concentration 3 (p.p.m) | Concentration 4 (p.p.m) | Concentration 5 (p.p.m) |
|---------|-------------------------|-------------------------|-------------------------|-------------------------|-------------------------|
| Water   | 0.10                    | 0.35                    | 1.5                     |                         |                         |
| Ether   | 0.15                    | 0.40                    | 0.70                    | 1.55                    | 1.71                    |
| Ethanol | 0.15                    | 0.46                    | 0.80                    | 1.57                    | 1.75                    |
